# Supplementary material for: Determination of solubility, stability and degradation kinetics of morin hydrate in physiological solutions
Source: Royal Society of Chemistry journal article supplement (doi:10.1039/c8ra04139c), 2018-01-01
Supplement: c8ra04139c1.pdf [file c8ra04139c1.pdf]

## Supplementary Information

### Determination of solubility, stability and degradation kinetics of morin hydrate in physiological solutions

Ashok Kumar Jangid<sup>1</sup>, Deep Pooja<sup>2</sup>, Hitesh Kulhari<sup>1,\*</sup>

<sup>1</sup>School of Nano Sciences, Central University of Gujarat, Gandhinagar 382030 India

<sup>2</sup>Pharmacology and Toxicology Division, CSIR-Indian Institute of Chemical Technology, Hyderabad-500007, Telangana, India.

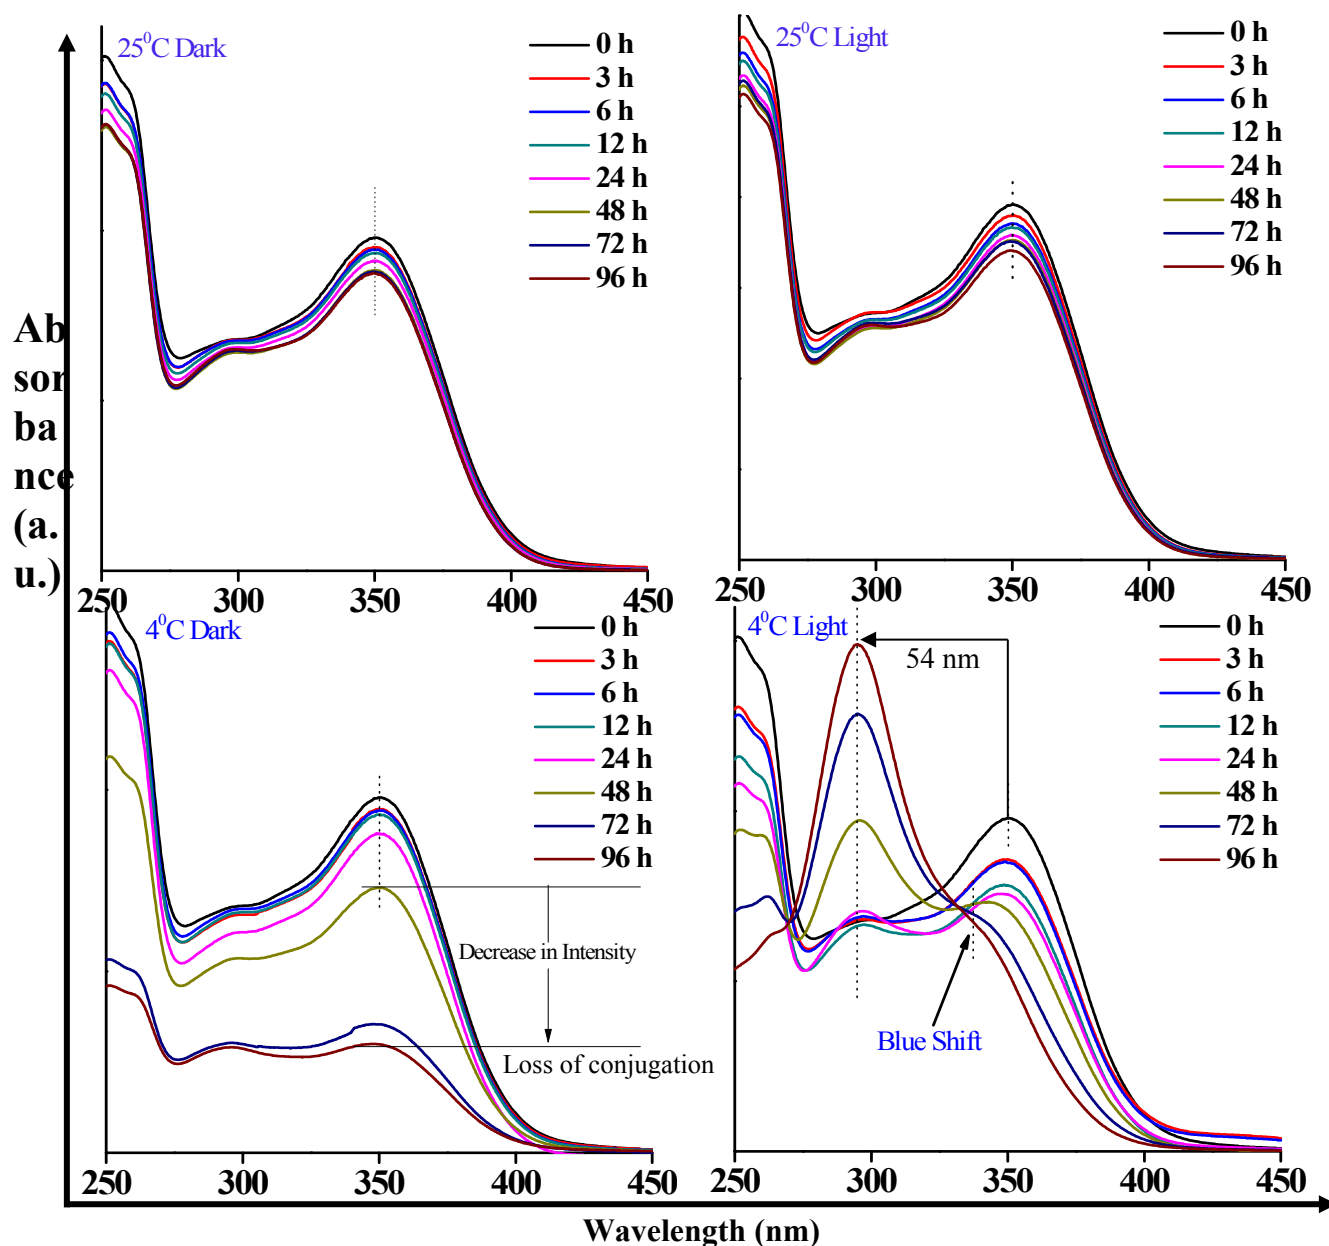

Figure. S1 UV-vis spectra of 25 mM morin hydrate in pH 1.2 (0.1 N HCl).

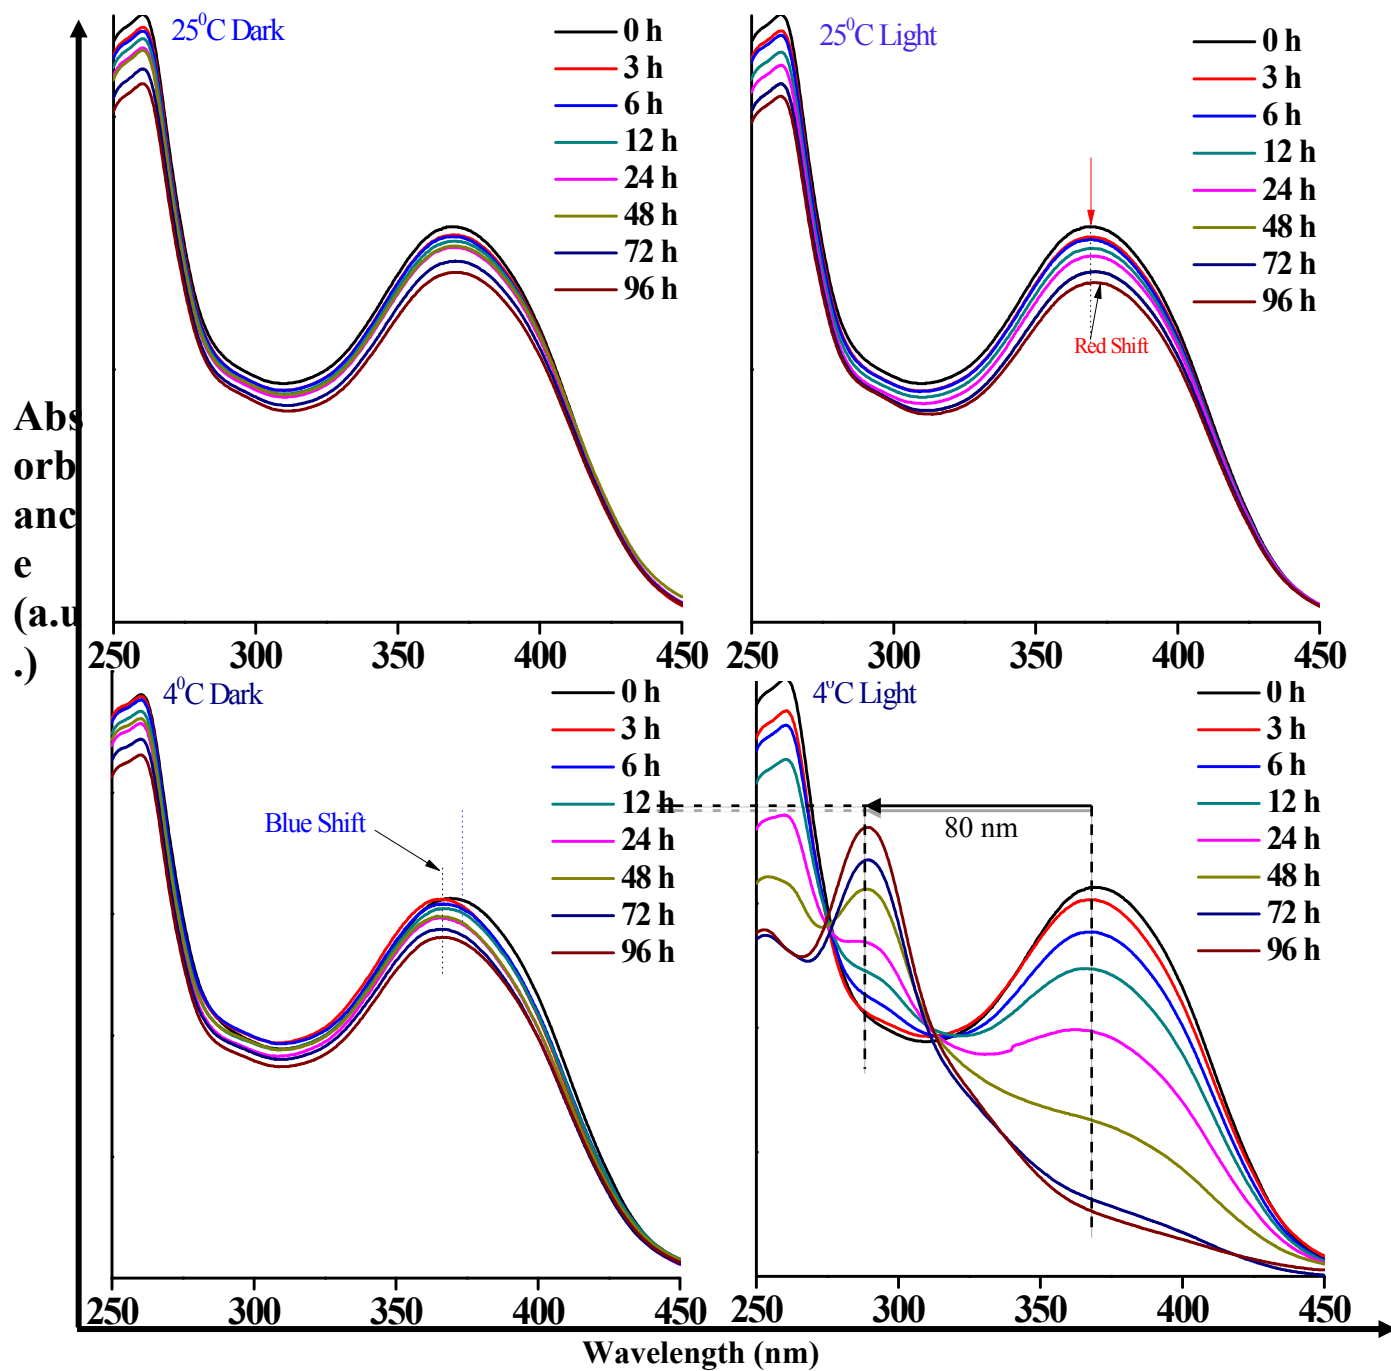

Figure. S2 UV-vis spectra of 25 mM morin hydrate in pH 5.0 (sodium acetate buffer).

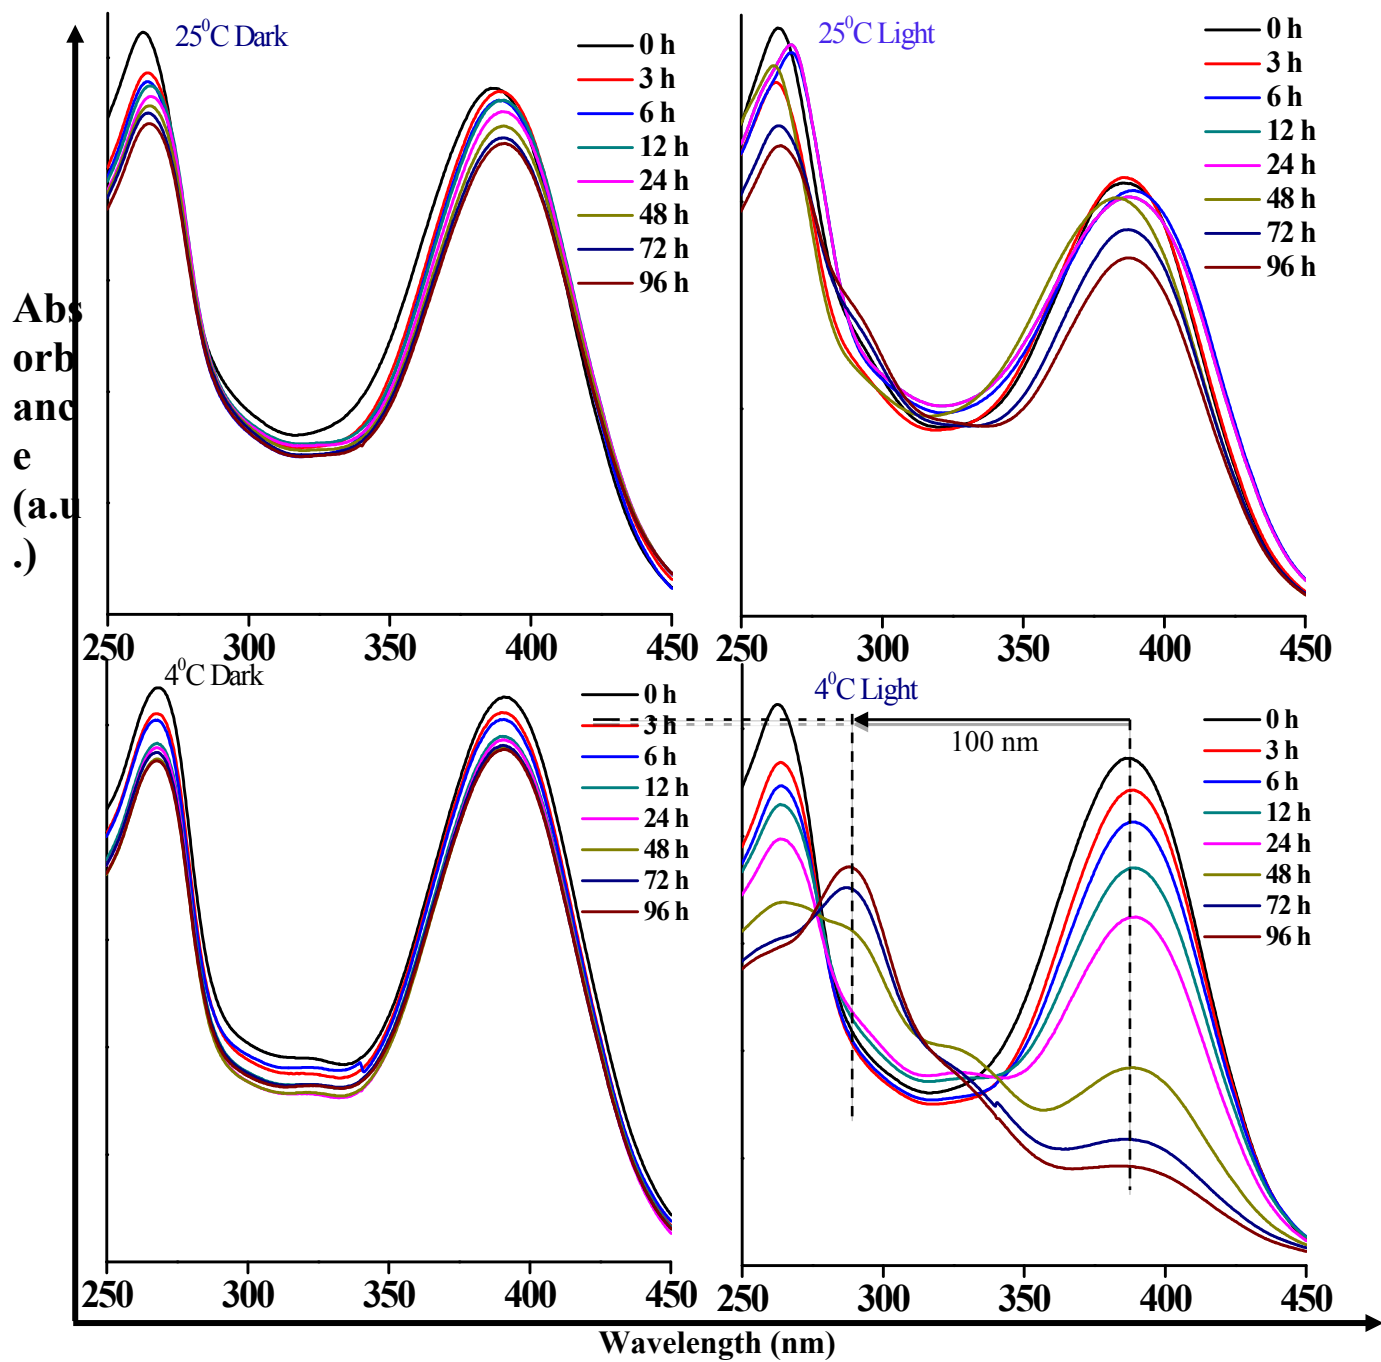

Figure. S3 UV-vis spectra of 25 mM morin hydrate in pH 7.0 (water).

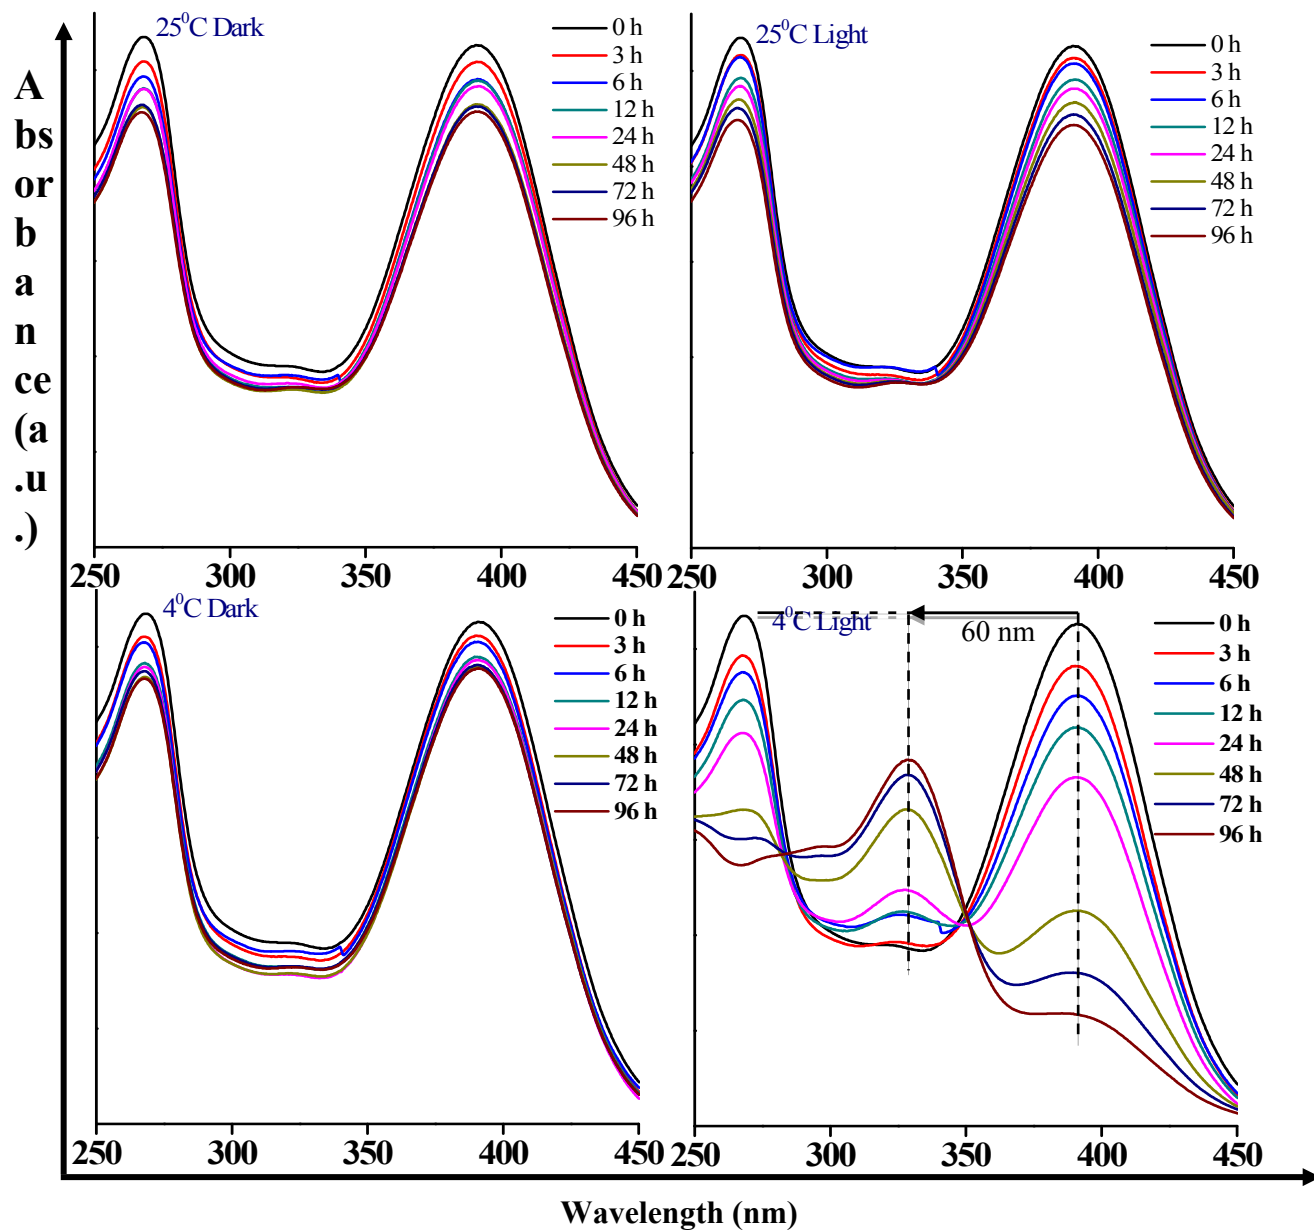

Figure. S4 UV-vis spectra of 25 mM morin hydrate in pH 7.4 (phosphate buffer saline).

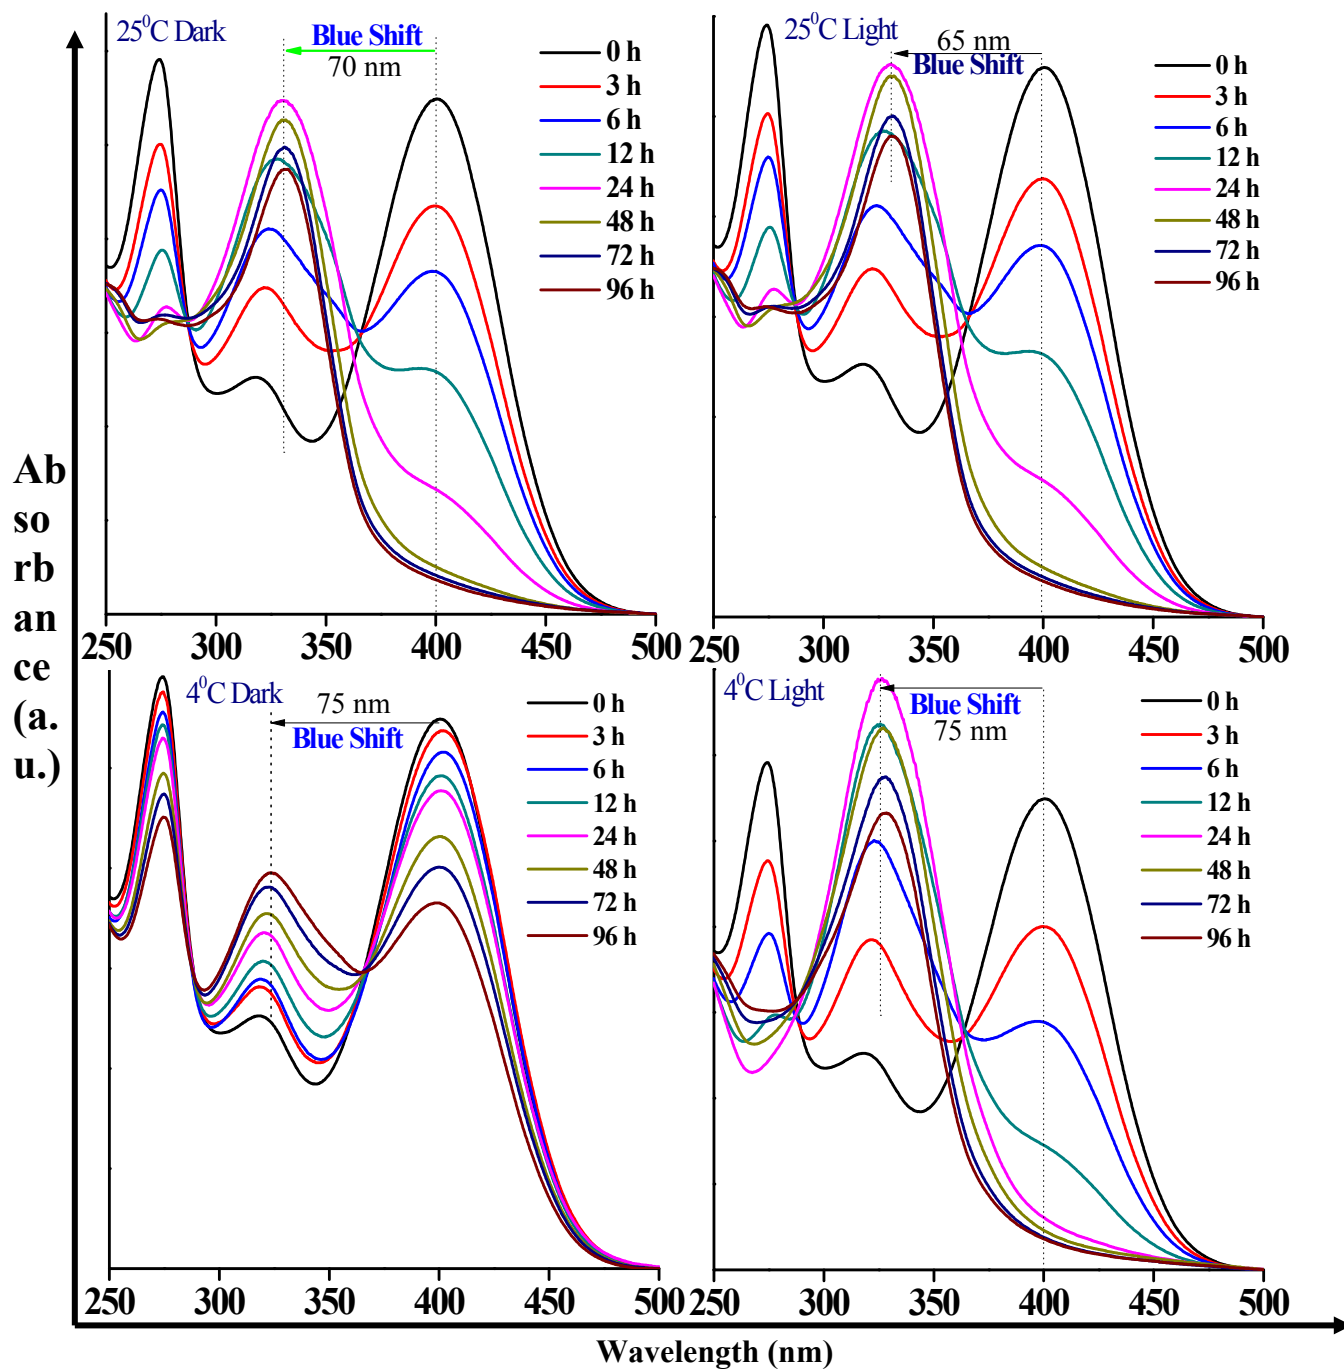

Figure. S5 UV-vis spectra of 25 mM morin hydrate in pH 9.0 tris base buffer.

**Table S1: Degradation rate constant (k) of morin hydrate in various pH solvents with different kinetic models.**

| Storage condition                                          | pH 1.2  | pH 5.0  | pH 7.0  | pH 7.4  | pH 9.0  |
|------------------------------------------------------------|---------|---------|---------|---------|---------|
| <b>Zero order (k = Mol<sup>1</sup>Sec<sup>-1</sup>)</b>    |         |         |         |         |         |
| RT Light                                                   | -0.4516 | -0.5811 | -0.1372 | -0.6488 | -3.2770 |
| RT Dark                                                    | -0.2477 | -0.2041 | -0.1896 | -0.2837 | -2.9725 |
| Freeze Light                                               | -0.8010 | -1.6514 | -1.2733 | -1.1818 | -3.4724 |
| Freeze Dark                                                | -0.3830 | -0.2296 | -0.2518 | -0.2907 | -0.5412 |
| <b>First order (k = Sec<sup>-1</sup>)</b>                  |         |         |         |         |         |
| RT Light                                                   | -0.0021 | -0.0028 | -0.0006 | -0.0032 | -0.0383 |
| RT Dark                                                    | -0.0011 | -0.0009 | -0.0008 | -0.0013 | -0.0252 |
| Freeze Light                                               | -0.0040 | -0.0085 | -0.0067 | -0.0062 | -0.0400 |
| Freeze Dark                                                | -0.0018 | -0.0010 | -0.0011 | -0.0013 | -0.0025 |
| <b>Second order (k = Mol<sup>-1</sup>Sec<sup>-1</sup>)</b> |         |         |         |         |         |
| RT Light                                                   | 0.00005 | 0.00007 | 0.00001 | 0.00008 | 0.00330 |
| RT Dark                                                    | 0.00003 | 0.00002 | 0.00002 | 0.00003 | 0.00130 |
| Freeze Light                                               | 0.00010 | 0.00020 | 0.00020 | 0.00020 | 0.00340 |
| Freeze Dark                                                | 0.00004 | 0.00002 | 0.00003 | 0.00003 | 0.00006 |

**Table S2: Regression coefficient value (r<sup>2</sup>) values of degradation rate with different kinetic models in various pH solvents.**

| Storage condition   | pH 1.2 | pH 5.0 | pH 7.0 | pH 7.4 | pH 9.0 |
|---------------------|--------|--------|--------|--------|--------|
| <b>Zero order</b>   |        |        |        |        |        |
| RT Light            | 0.7942 | 0.8947 | 0.8327 | 0.8342 | 0.8294 |
| RT Dark             | 0.8306 | 0.8636 | 0.9723 | 0.6496 | 0.9357 |
| Freeze Light        | 0.7367 | 0.9877 | 0.9550 | 0.9347 | 0.8564 |
| Freeze Dark         | 0.9415 | 0.9942 | 0.6279 | 0.8054 | 0.8939 |
| <b>First order</b>  |        |        |        |        |        |
| RT Light            | 0.8124 | 0.9102 | 0.8319 | 0.8580 | 0.9902 |
| RT Dark             | 0.8387 | 0.8703 | 0.9722 | 0.6565 | 0.9977 |
| Freeze Light        | 0.7681 | 0.9959 | 0.974  | 0.9602 | 0.9882 |
| Freeze Dark         | 0.9448 | 0.9948 | 0.6337 | 0.8107 | 0.9032 |
| <b>Second order</b> |        |        |        |        |        |
| RT Light            | 0.8297 | 0.9237 | 0.8311 | 0.8795 | 0.9599 |
| RT Dark             | 0.8465 | 0.8768 | 0.9721 | 0.6635 | 0.9775 |
| Freeze Light        | 0.7980 | 0.9955 | 0.9877 | 0.9793 | 0.9694 |
| Freeze Dark         | 0.9473 | 0.9953 | 0.6395 | 0.8158 | 0.9122 |
